# Supplementary material for: Image-Guided Intraoperative Assessment of Surgical Margins in Oral Cavity Squamous Cell Cancer: A Diagnostic Test Accuracy Review
Source: MDPI journal article supplement (doi:10.3390/diagnostics13111846), 2023-05-25
Supplement: s1 [file s1]

| Study                       | was the sample size large enough to represent the characteristics of the general population | was the number of readers sufficient to avoid potential misclassification? |
|-----------------------------|---------------------------------------------------------------------------------------------|----------------------------------------------------------------------------|
| Adrianseens 2023            | No                                                                                          | No                                                                         |
| Bubul 2021                  | No                                                                                          | Unclear                                                                    |
| De Konig 2022               | Unclear                                                                                     | Unclear                                                                    |
| De Koning 2021              | No                                                                                          | Yes                                                                        |
| Giannitto 2021              | No                                                                                          | Yes                                                                        |
| Heidkamp 2019               | No                                                                                          | Yes                                                                        |
| Nilsson 2022                | Unclear                                                                                     | Unclear                                                                    |
| Steens 2017 – handsearching | No                                                                                          | Yes                                                                        |
| Tarabichi 2018              | No                                                                                          | Unclear                                                                    |
| Zhang 2022                  | Yes                                                                                         | Yes                                                                        |

| Study              | Was a case-control design avoided? | Could the selection of patients have introduced bias? | Were all patients included in the analysis? | Could the patient flow have introduced bias? |
|--------------------|------------------------------------|-------------------------------------------------------|---------------------------------------------|----------------------------------------------|
| Adrianseens 2023   | Yes                                | Low risk                                              | No                                          | Low risk                                     |
| Bubul 2021         | No                                 | Unclear risk                                          | Yes                                         | Unclear risk                                 |
| De Konig 2022      | No                                 | Low risk                                              | No                                          | Unclear risk                                 |
| De Koning 2021     | No                                 | High risk                                             | Yes                                         | Low risk                                     |
| Giannitto 2021     | Yes                                | Unclear risk                                          | Yes                                         | Low risk                                     |
| Heidkamp 2019      | Yes                                | Low risk                                              | Yes                                         | Low risk                                     |
| Nilsson 2022       | No                                 | Low risk                                              | Yes                                         | Low risk                                     |
| Steens 2017 – hand | Yes                                | Unclear risk                                          | No                                          | Low risk                                     |
| Tarabichi 2018     | Yes                                | High risk                                             | Yes                                         | Low risk                                     |
| Zhang 2022         | Yes                                | Low risk                                              | Yes                                         | Low risk                                     |

| Study              | were the skills of the operators developed enough to guarantee average standards? | were inclusion and exclusion criteria clearly stated | was masking applied |
|--------------------|-----------------------------------------------------------------------------------|------------------------------------------------------|---------------------|
| Adrianseens 2023   | Unclear                                                                           | Yes                                                  | Unclear             |
| Bubul 2021         | Yes                                                                               | Yes                                                  | Yes                 |
| De Konig 2022      | Yes                                                                               | Yes                                                  | Unclear             |
| De Koning 2021     | No                                                                                | Yes                                                  | Unclear             |
| Giannitto 2021     | Yes                                                                               | No                                                   | Yes                 |
| Heidkamp 2019      | Yes                                                                               | Yes                                                  | Yes                 |
| Nilsson 2022       | Yes                                                                               | Yes                                                  | Unclear             |
| Steens 2017 – hand | Yes                                                                               | No                                                   | No                  |
| Tarabichi 2018     | Unclear                                                                           | No                                                   | No                  |
| Zhang 2022         | Yes                                                                               | Yes                                                  | Yes                 |
