# Supplementary material for: Image-Guided Intraoperative Assessment of Surgical Margins in Oral Cavity Squamous Cell Cancer: A Diagnostic Test Accuracy Review
Source: MDPI journal article supplement (doi:10.3390/diagnostics13111846), 2023-05-25
Supplement: s1 [file s1]

## Characteristics of excluded studies 📄

### Au 2022

|                      |                                                                                                                                                                                                                                                                                                                                                                                                                                                                             |
|----------------------|-----------------------------------------------------------------------------------------------------------------------------------------------------------------------------------------------------------------------------------------------------------------------------------------------------------------------------------------------------------------------------------------------------------------------------------------------------------------------------|
| Reason for exclusion | Oral presentation – 29 patients in total; retrospective cohort study . T1–T3 tumors evaluated by 2 experienced head and neck neuroradiologists and 2 pathologists. Results: Eight out of the 11 patients (73%) with infiltrative TS had resection margin <5 mm; 1 at 4.5 mm, 2 at 4 mm, 4 at 3 mm, and 1 at <1 mm. Tumors with ill-defined TB on US were 8.7 times (95% CI, 1.40–53.8) more likely to not have perineural invasion, when compared with those with sharp TB. |
|----------------------|-----------------------------------------------------------------------------------------------------------------------------------------------------------------------------------------------------------------------------------------------------------------------------------------------------------------------------------------------------------------------------------------------------------------------------------------------------------------------------|

### Clayburgh 2016

|                      |                                                                                                                                                                    |
|----------------------|--------------------------------------------------------------------------------------------------------------------------------------------------------------------|
| Reason for exclusion | outcomes evaluated were not in line with the main question of the systematic review – <i>ie IOUS–assessment of cancer of the oropharynx (image–guided surgery)</i> |
|----------------------|--------------------------------------------------------------------------------------------------------------------------------------------------------------------|

### De Konig2020

|                      |                                                                                                                                                                                                            |
|----------------------|------------------------------------------------------------------------------------------------------------------------------------------------------------------------------------------------------------|
| Reason for exclusion | outcomes evaluated were not in line with the main question of the systematic review– <i>difference between ioIOUS measurement of DOI and TT compared to histology. Surgical margins were NOT evaluated</i> |
|----------------------|------------------------------------------------------------------------------------------------------------------------------------------------------------------------------------------------------------|

### Green 2020

|                      |                                                                                                                                                                                                                |
|----------------------|----------------------------------------------------------------------------------------------------------------------------------------------------------------------------------------------------------------|
| Reason for exclusion | outcomes evaluated were not in line with the main question of the systematic review – <i>ie IOUS–assessment of surgical margins in cancer of the oropharynx (among which also retropharyngeal lymph nodes)</i> |
|----------------------|----------------------------------------------------------------------------------------------------------------------------------------------------------------------------------------------------------------|

### Lee Dong 2022

|                      |                                                                                                                                                                                               |
|----------------------|-----------------------------------------------------------------------------------------------------------------------------------------------------------------------------------------------|
| Reason for exclusion | the measured outcome was not in line with the question formulated in the review – <i>ie evaluating the impact of resection margins on long–term prognosis, regardless on imaging guidance</i> |
|----------------------|-----------------------------------------------------------------------------------------------------------------------------------------------------------------------------------------------|

### McMahon 2020

|                      |                                                                                                                                                                                                                        |
|----------------------|------------------------------------------------------------------------------------------------------------------------------------------------------------------------------------------------------------------------|
| Reason for exclusion | the object of the study was not in line with the question formulated in the review– <i>ie evaluating the impact of imaging on surgical margins on OTSCC– where imaging was only preoperative and also including CT</i> |
|----------------------|------------------------------------------------------------------------------------------------------------------------------------------------------------------------------------------------------------------------|

### Noorlag 2020

|                      |                                                                                                                                                                                 |
|----------------------|---------------------------------------------------------------------------------------------------------------------------------------------------------------------------------|
| Reason for exclusion | the characteristics of the paper do not meet the inclusion criteria set in the systematic review– both intraoral US and MRI were undertaken before (10 days on average) surgery |
|----------------------|---------------------------------------------------------------------------------------------------------------------------------------------------------------------------------|

### Noorlag 2022

|                      |                                 |
|----------------------|---------------------------------|
| Reason for exclusion | the paper is a narrative review |
|----------------------|---------------------------------|

### wang 2020

|                      |                                                                                                                                                                                                                                                                |
|----------------------|----------------------------------------------------------------------------------------------------------------------------------------------------------------------------------------------------------------------------------------------------------------|
| Reason for exclusion | the measured outcome was not in line with the question formulated in the review – <i>ie evaluating the difference between ex–vivo MR DOI measurement and pathological DOI. also DOI &gt;5 and 10 mm were evaluated but no mention to the surgical margins.</i> |
|----------------------|----------------------------------------------------------------------------------------------------------------------------------------------------------------------------------------------------------------------------------------------------------------|

### Wu–Chia 2018

|                      |                                 |
|----------------------|---------------------------------|
| Reason for exclusion | the paper is a narrative review |
|----------------------|---------------------------------|
