# Supplementary material for: Image-Guided Intraoperative Assessment of Surgical Margins in Oral Cavity Squamous Cell Cancer: A Diagnostic Test Accuracy Review
Source: MDPI journal article supplement (doi:10.3390/diagnostics13111846), 2023-05-25
Supplement: s1 [file s1]

|                           | Risk of bias                                                                                                                                                                                                                                                                                                                                                                                                                                                                                                                                                                                                | Concerns regarding applicability                                                                                                                                                                                                                                                                                                                                                                                                                                  |
|---------------------------|-------------------------------------------------------------------------------------------------------------------------------------------------------------------------------------------------------------------------------------------------------------------------------------------------------------------------------------------------------------------------------------------------------------------------------------------------------------------------------------------------------------------------------------------------------------------------------------------------------------|-------------------------------------------------------------------------------------------------------------------------------------------------------------------------------------------------------------------------------------------------------------------------------------------------------------------------------------------------------------------------------------------------------------------------------------------------------------------|
| <b>Patient selection</b>  | <ul style="list-style-type: none"> <li>• Patient sampling (open)</li> <li>• Was a consecutive or random sample of patients enrolled ? Y/N</li> <li>• Was a case-control design avoided? Y/N</li> <li>• Did the study avoid inappropriate exclusions ? Y/N</li> <li>• Were inclusion and exclusion criteria clearly stated? Y/N</li> <li>• <b>Could the selection of patients have introduced bias?</b>(Low/ unclear/high risk)</li> </ul>                                                                                                                                                                   | <ul style="list-style-type: none"> <li>• Patient characteristics and sampling (open)</li> <li>• Was the sample size large enough to represent the general characteristics of the population? Y/N</li> <li>• Was the median follow-up of patients long enough to ensure correct estimation of the outcomes? Y/N</li> <li>• <b>Are there concerns that the included patients and settings do not match the review question?</b>( Low/ unclear/high risk)</li> </ul> |
| <b>Index test</b>         | <ul style="list-style-type: none"> <li>• Where the index test results interpreted without knowledge of the results of the reference standard? (open)</li> <li>• If a threshold was used, was it pre specified? Y/N</li> <li>• Was the number of readers sufficient to avoid potential misclassification? Y/N</li> <li>• Where the skills of the operators developed enough to guarantee average standards? Y/N</li> <li>• <b>Was masking applied?</b> ( Low/ unclear/high risk)</li> </ul>                                                                                                                  | <b>Are there concerns that the index test, its conduct, or interpretation differ from the review question?</b> ( Low/ unclear/high risk)                                                                                                                                                                                                                                                                                                                          |
| <b>Reference standard</b> | <ul style="list-style-type: none"> <li>• results of the reference standard (open)</li> <li>• If a threshold was used, was it pre specified? Y/N</li> <li>• Was the number of readers sufficient to avoid potential misclassification? Y/N</li> <li>• Were the reference standards likely to correctly classify the target condition? Y/N</li> <li>• Where the reference standard results interpreted without knowledge of the results of the index tests? Y/N</li> <li>• <b>Could the reference standard, its conduct, or its interpretation have introduced bias?</b> ( Low/ unclear/high risk)</li> </ul> | <b>Are there concerns that the target condition as defined by the reference standard does not match the review question?</b> ( Low/ unclear/high risk)                                                                                                                                                                                                                                                                                                            |
| <b>Flow and timing</b>    | <ul style="list-style-type: none"> <li>• Flow and timing (open)</li> <li>• Was there an appropriate interval between index test and reference standard? Y/N</li> <li>• Did all patients receive the same reference standard? Y/N</li> <li>• Where all patients included in the analysis? Y/N</li> <li>• <b>Could the patient flow have introduced bias?</b> Low/ unclear/high risk)</li> </ul>                                                                                                                                                                                                              | \\                                                                                                                                                                                                                                                                                                                                                                                                                                                                |
